# Supplementary material for: Ultraconfinement of aqueous electrolytic solutions within hydrophilic nanotubes
Source: Royal Society of Chemistry journal article supplement (doi:10.1039/c4ra04604h), 2014-01-01
Supplement: c4ra04604h1.pdf [file c4ra04604h1.pdf]

# Supporting Information

## Ultraconfinement of Aqueous Electrolytic Solutions within hydrophilic Nanotubes

Richard Renou,<sup>†</sup> Anthony Szymczyk,<sup>†</sup> and Aziz Ghoufi<sup>\*,‡</sup>

*Institut des Sciences Chimiques de Rennes, UMR 6226 CNRS, Université de Rennes 1,  
263 Avenue du Général Leclerc, 35042 Rennes, France; Université Européenne de  
Bretagne, France., and Institut de Physique de Rennes, IPR, CNRS-University of  
Rennes 1, UMR CNRS 6251, 35042 Rennes, France*

E-mail: aziz.ghoufi@univ-rennes1.fr

### Abstract

---

\*To whom correspondence should be addressed

<sup>†</sup>Institut des Sciences Chimiques de Rennes, UMR 6226 CNRS, Université de Rennes 1, 263 Avenue du Général Leclerc, 35042 Rennes, France; Université Européenne de Bretagne, France.

<sup>‡</sup>Institut de Physique de Rennes, IPR, CNRS-University of Rennes 1, UMR CNRS 6251, 35042 Rennes, France

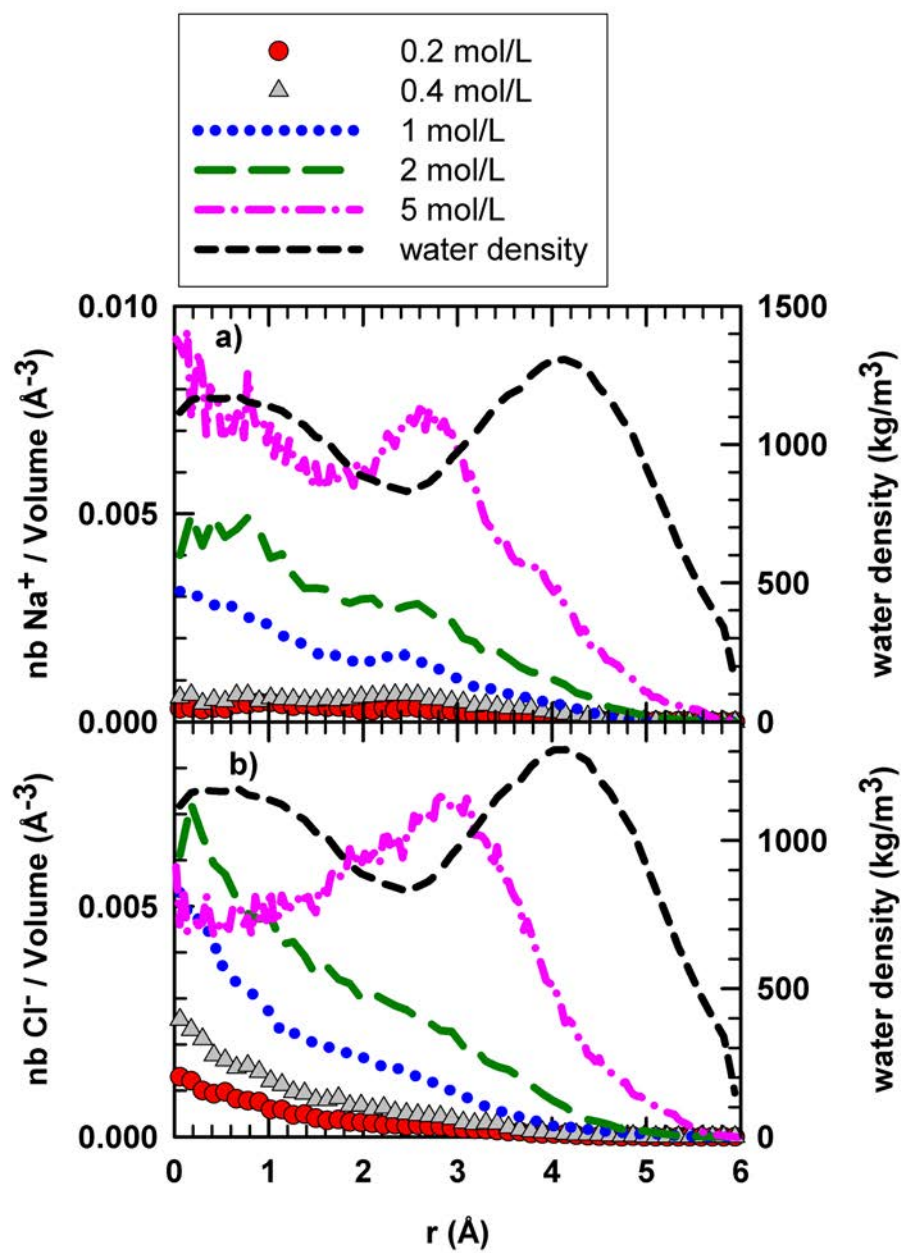

Figure S1: Radial distributions of  $\text{Na}^+$  (a) and  $\text{Cl}^-$  (b) for 0.2, 0.4, 1, 2 and 5 mol/L NaCl solutions. Radial water density corresponding to the NaCl concentration of 0.2 mol/L can be read on the right axis. Water density

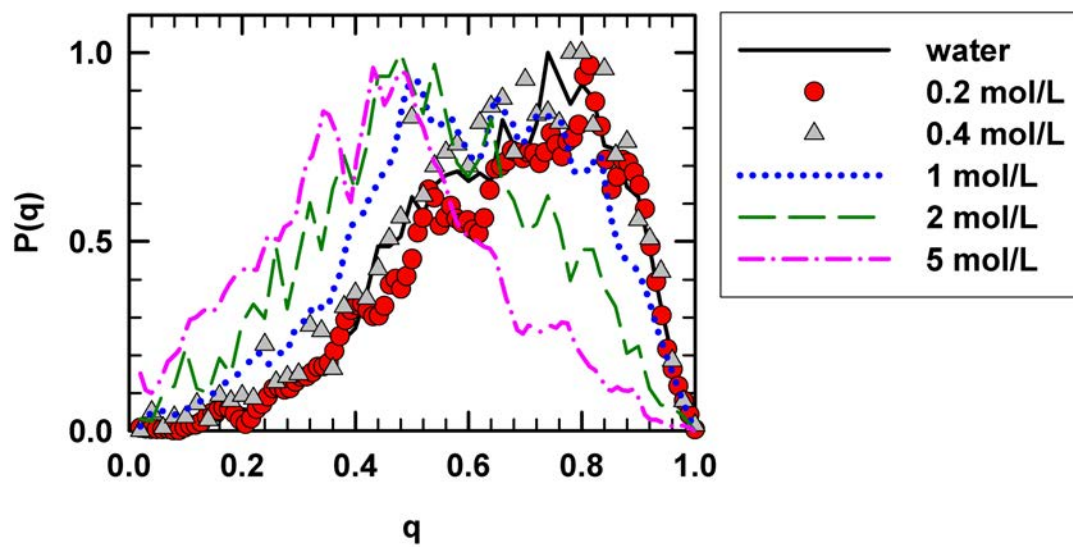

Figure S2: Tetrahedral order distribution of water molecules in bulk phase as function of the NaCl concentration

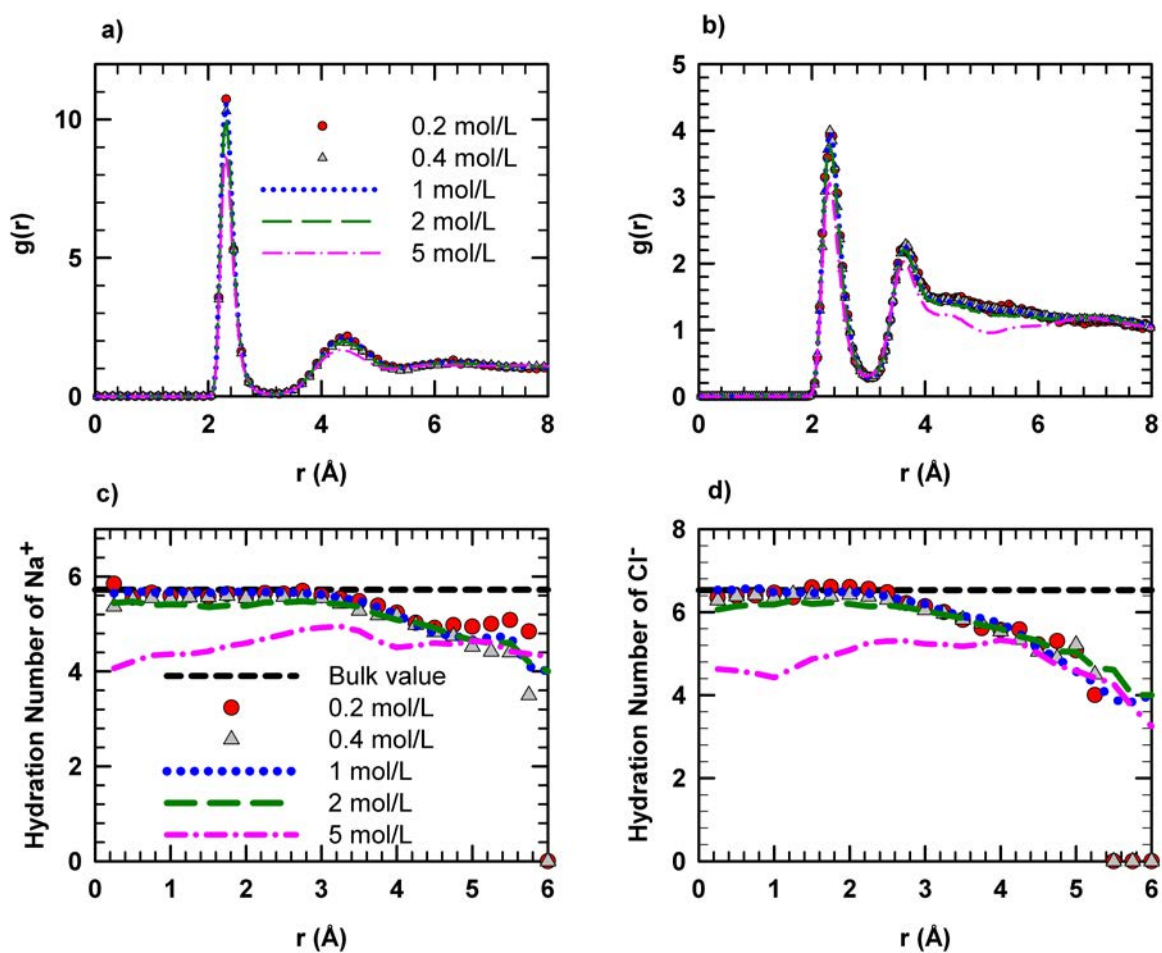

Figure S3: Radial distribution function a) between the oxygen atom water and  $\text{Na}^+$  ion and b) between the hydrogen atom of water H and  $\text{Cl}^-$  ion as function of the NaCl concentration. Radial profile of hydration number of c)  $\text{Na}^+$  and d)  $\text{Cl}^-$  as function of the NaCl concentration.

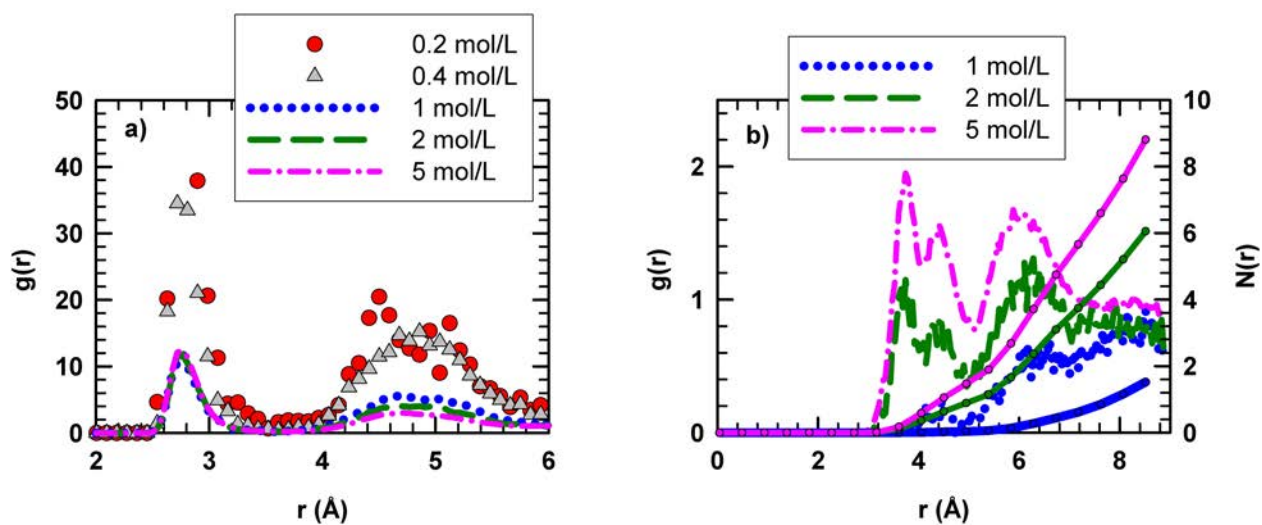

Figure S4: Radial distribution function a) between Na<sup>+</sup> and Cl<sup>-</sup> ions and b) between Na<sup>+</sup> and Na<sup>+</sup> ions as function of the NaCl concentration. In b) the coordination number of Na<sup>+</sup> can be read on the right axis. Coordination numbers were calculated from the integration of the radial distribution functions and correspond to the solid lines in b).

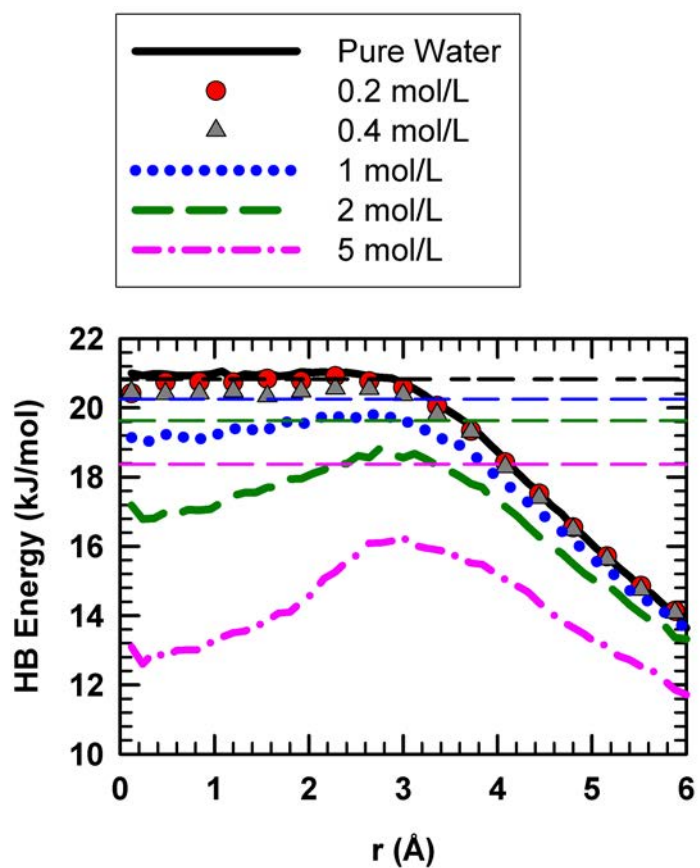

Figure S5: Radial HB energy as function of the NaCl concentration. Energy was calculated by considering electrostatic and Van der Waals interactions between two water molecules. The horizontal lines correspond to the HB energy in bulk phase.

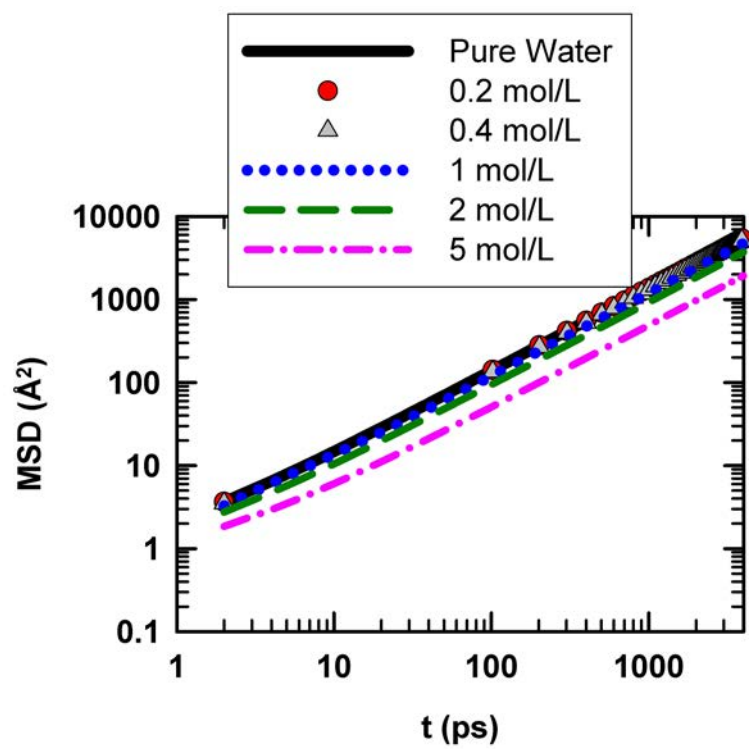

Figure S6: Mean square displacement (MSD) of water molecules in bulk phase as function of the NaCl concentration.
